# Supplementary material
Source: MDPI journal article supplement (https://www.mdpi.com/1996-1073/13/15/4022)
Supplement: s1 [file s1]

# Education for Sustainable Energy: Comparison of Different Types of E-Learning Activities

**María Ángeles Martín-Lara <sup>1,\*</sup> and Nuria Rico <sup>2</sup>**

<sup>1</sup> Chemical Engineering Department, Faculty of Sciences, Avda. Fuentenueva, s/n, 18071 Granada, Spain

<sup>2</sup> Department of Statistics and Operational Research, Faculty of Sciences, Avda. Fuentenueva, s/n, 18071 Granada, Spain; nrco@ugr.es

\* Correspondence: marianml@ugr.es; Tel.: +34-958-240445

Received: 14 July 2020; Accepted: 31 July 2020; Published: 4 August 2020

## COURSES CONTENT

### **COURSE 1: SOLID AND GASEOUS WASTE TREATMENT COURSE**

#### **Part I – Solid Waste Management (SWM).**

Module 1: An overview of the steps of SWM from waste generation to final use/disposal.

Module 2: Waste conversion/treatment processes: mechanical-biological treatment.

Module 3: Waste conversion/treatment processes: anaerobic digestion technologies and production of biogas fuel.

Module 4: Waste conversion/treatment processes: composting technologies.

Module 5: Waste conversion/treatment processes: thermochemical conversion technologies.

Module 6: Most suitable SWM options in a specific local context.

Module 7: Environmental and economic impact of SWM options.

Module 8: Innovative solutions of SWM in urban areas.

Module 9: An introduction to Circular Economy.

#### **Part II – Treatment of gaseous effluents.**

Module 10: Air quality and pollution control.

Module 11: The engineering control of air pollution: cyclone.

Module 12: The engineering control of air pollution: electrostatic precipitation.

Module 13: The engineering control of air pollution: wet and dry scrubbing.

Module 14: The engineering control of air pollution: thermal and catalytic oxidation.

Module 15: The engineering control of air pollution: emerging air pollution control technologies.

## **COURSE 2: BIOFUELS AND RENEWABLE ENERGIES COURSE**

### **Part I – Biomass Processing Technologies.**

Module 1: Introduction of bioenergy and biomass fuels.

Module 2: Combustion of biomass.

Module 3: Torrefaction, pyrolysis and gasification for the production of fuels and chemical from biomass.

Module 4: Production of biodiesel from biomass.

Module 5: Production of bioethanol from biomass.

Module 6: Production of biogas from biomass.

Module 7: Life-Cycle environmental impacts of biofuels and co-products.

### **Part II – Alternative renewable energy production technologies**

Module 8: Hydropower technologies.

Module 9: Wind Power Technologies.

Module 10: Solar Power Technologies

Module 11: Geothermal Power Technologies.

Module 12: Other Renewable Power Technologies.

### **Part III – Regulatory Frameworks for Renewable Energy Sources.**

Module 13: National and International Environmental Policies.

Module 14: Existing Marketplaces.
